# Supplementary material
Source: publisher figshare collection journal article supplement (https://frontiersin.figshare.com/ndownloader/files/34524332)
Supplement: Supplementary file 1 [file 34524332]

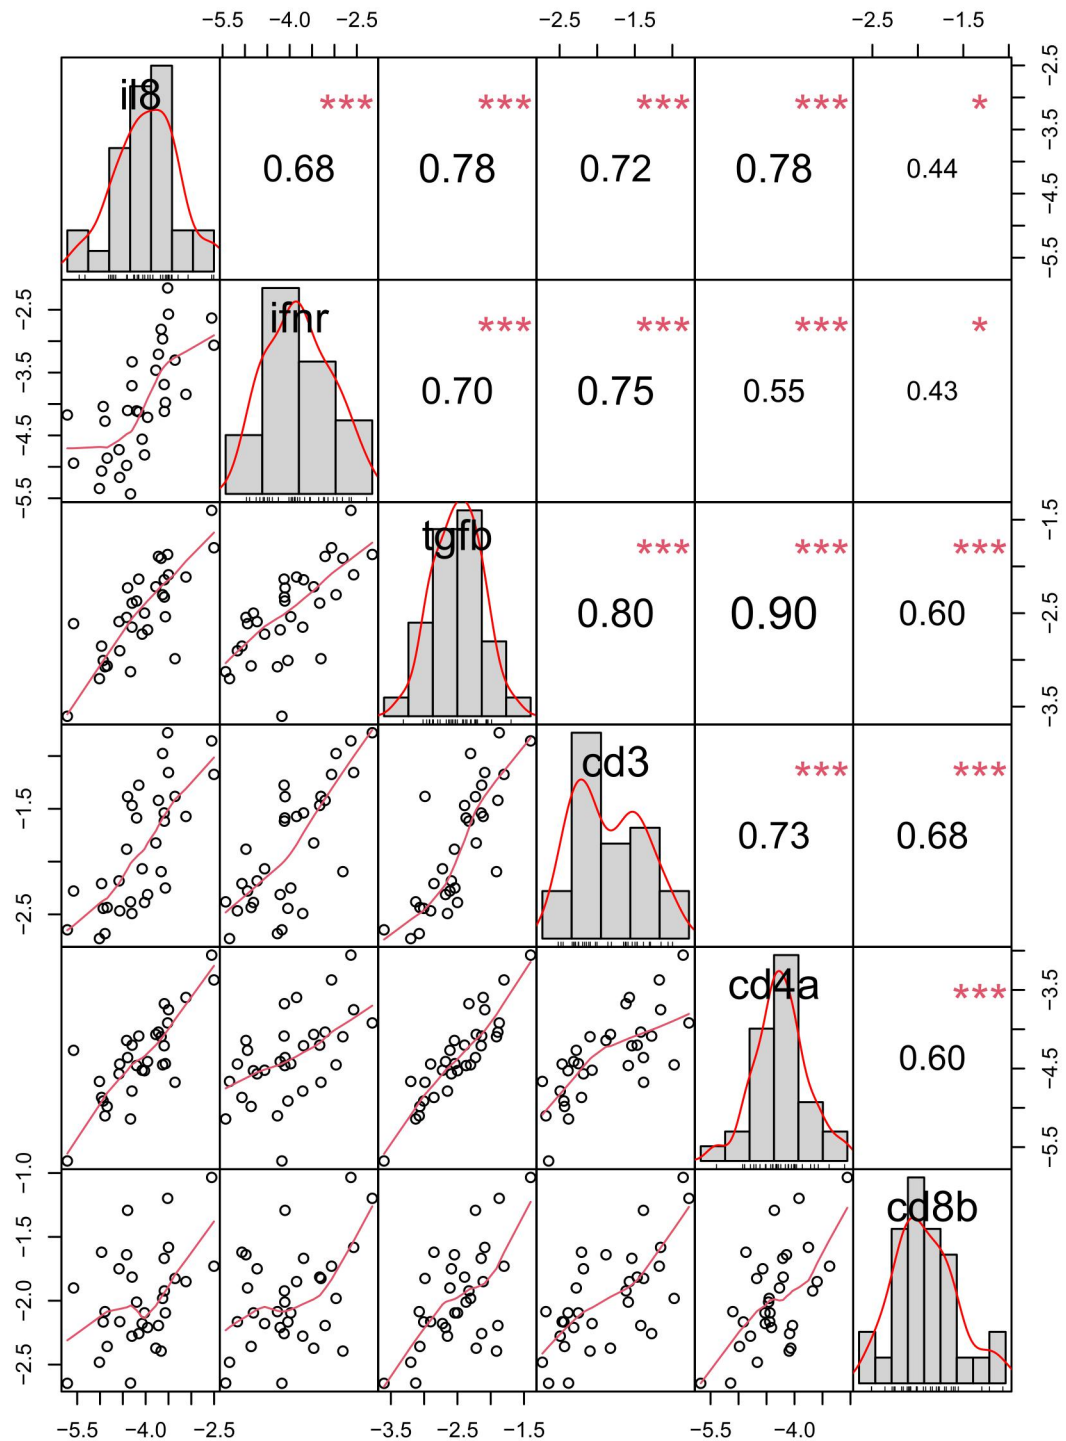

**Supplementary Figure 3** | Correlation between gut immune related genes. Chart showing patterns of correlations across genes related to gut immune functions. The distribution of each variable is shown on the diagonal. The bottom part of the diagonal shows scatter plots of the expression with a fitted line displayed. The top part shows the Pearson correlation coefficients for all pairs of variables including significant correlations marked by red stars with p-value: \*\*\*<0.001, \*\*<0.01, \*<0.05.
